# Supplementary material for: Knockdown lncRNA DLEU1 Inhibits Gliomas Progression and Promotes Temozolomide Chemosensitivity by Regulating Autophagy
Source: Front Pharmacol. 2020 Dec 9;11:560543. doi: 10.3389/fphar.2020.560543 (PMC7756250; doi:10.3389/fphar.2020.560543)
Supplement: Supplementary file 1 [file table1.docx]

**Knockdown lncRNA DLEU1 inhibits gliomas progression by inhibiting** **EMT and promotes temozolomide** **chemosensitivity by regulating autophagy**

**Qiao-li Lv1**†**, Li-chong Wang1,2,**†**, Dang-chi Li3, Qian-xia Lin4, Xiao-li Shen2, Hai-yun Liu4, Min Li5, Yu-long Ji4, Chong-zhen Qin6, Shu-hui Chen7***


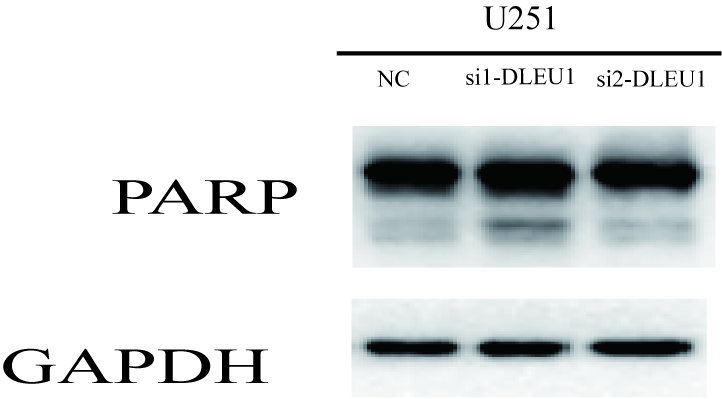


Figure1s the changes of PARP in protein levels.
